# Supplementary material for: A Machine Learning Approach to Analyze Home Advantage during COVID-19 Pandemic Period with Regards to Margin of Victory and to Different Tournaments in Professional Rugby Union Competitions
Source: MDPI journal article supplement (doi:10.3390/ijerph182312711), 2021-12-02
Supplement: s1 [file s1]

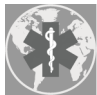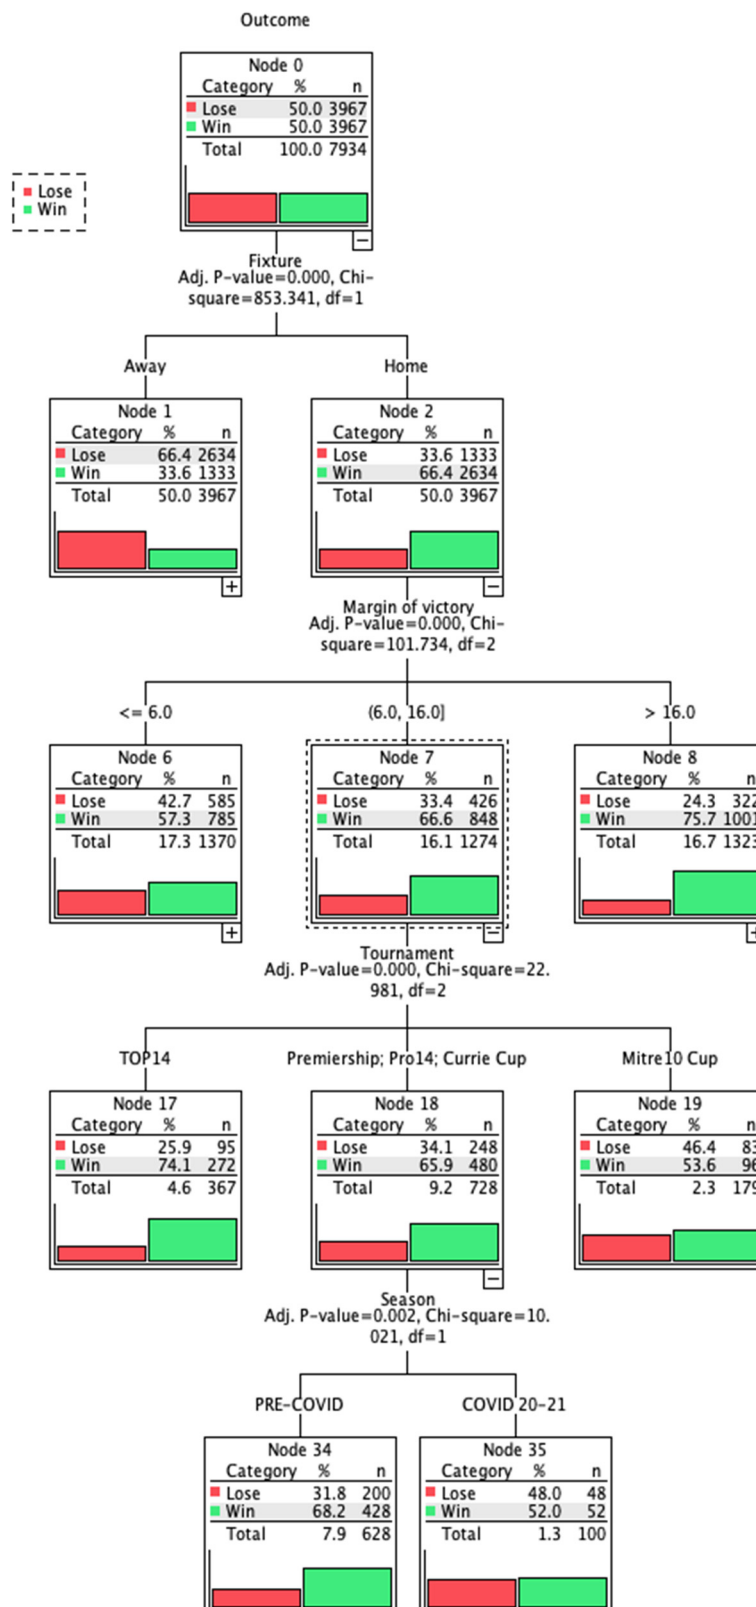

Figure S1. Home Balanced Games.

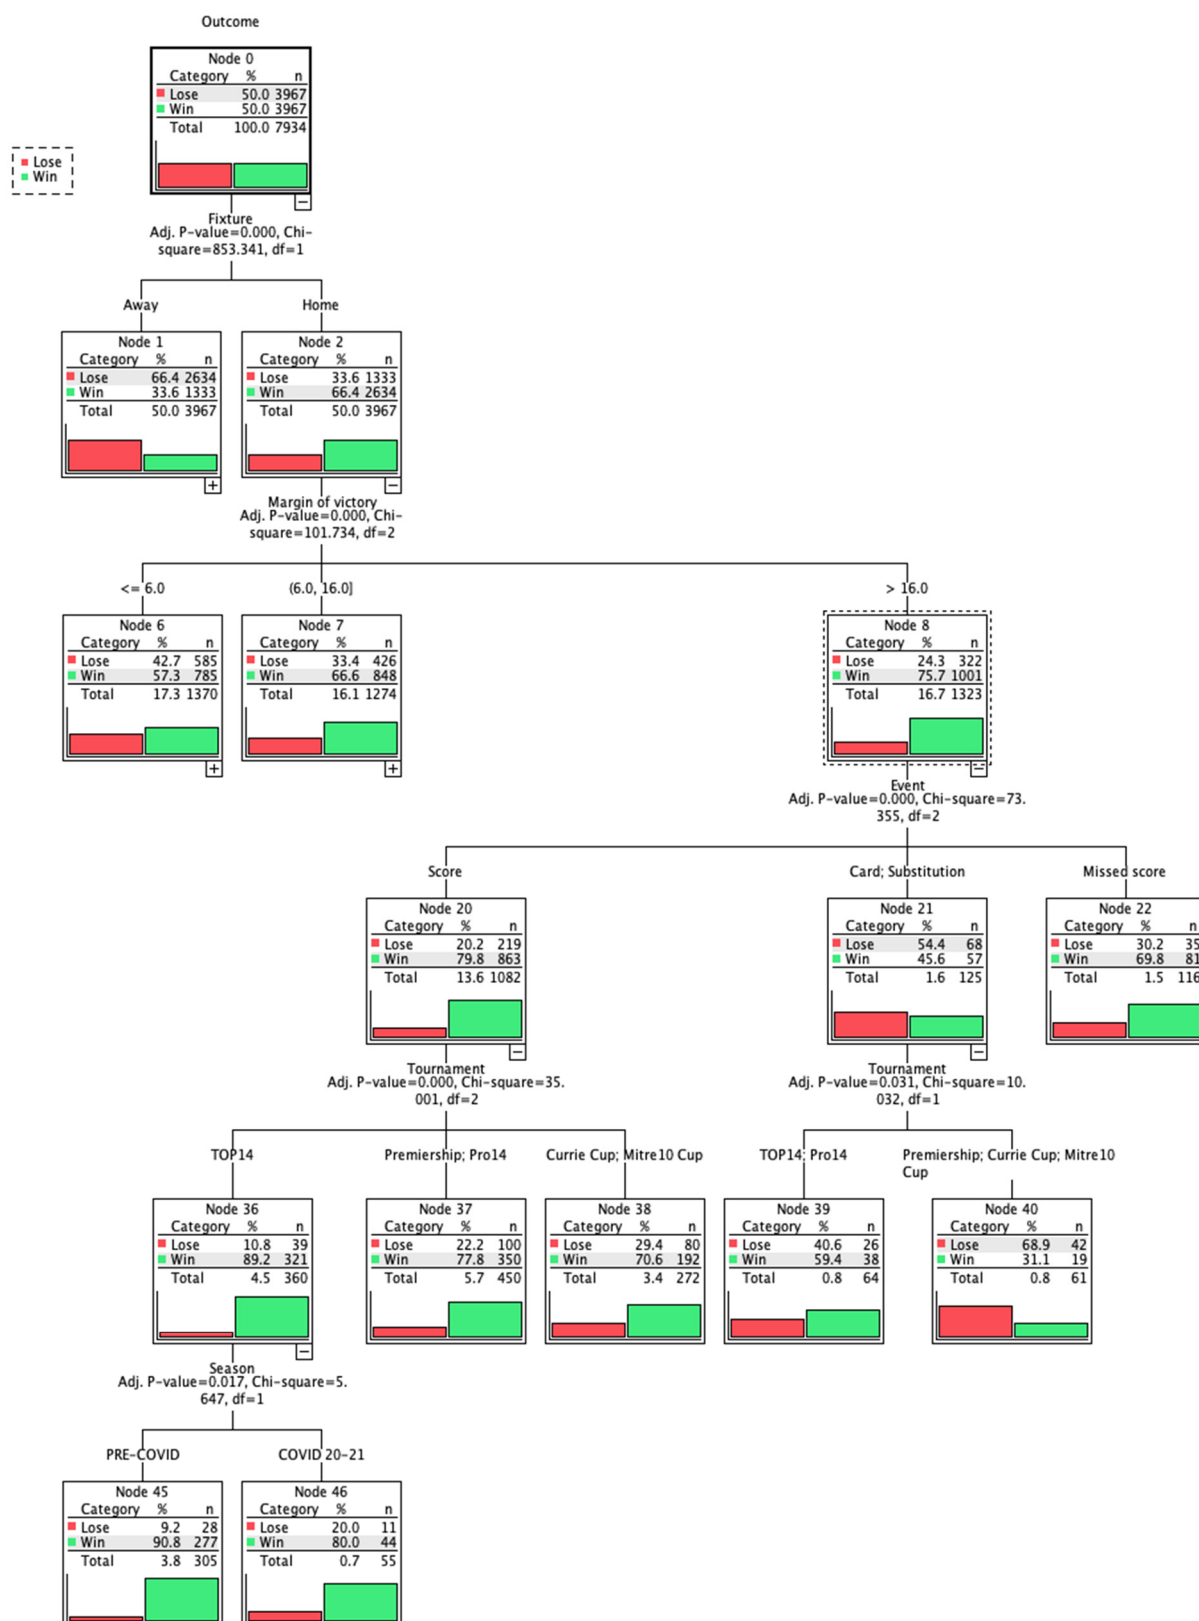

Figure S2. Home Unbalanced Games.

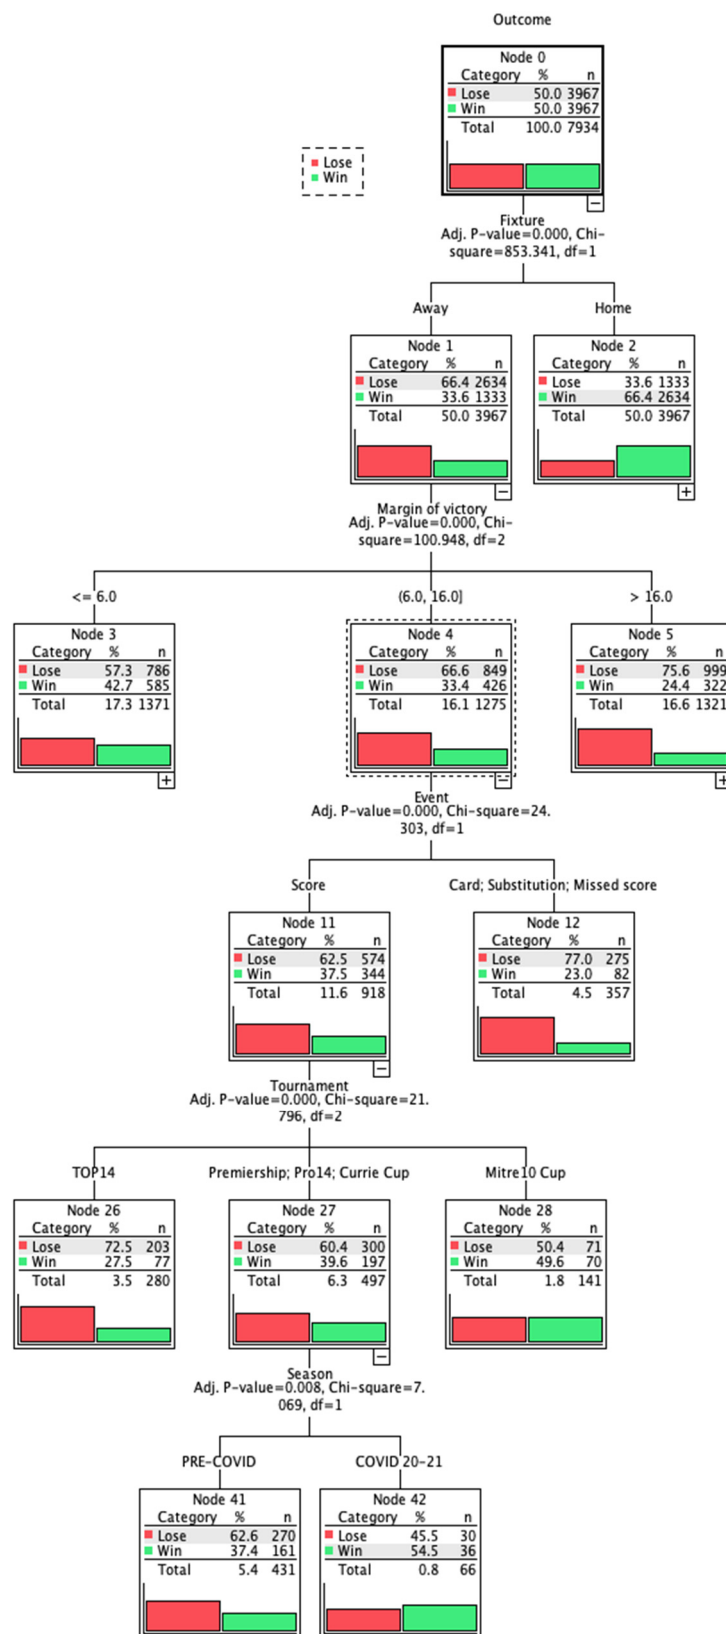

Figure S3. Away Balanced Games.

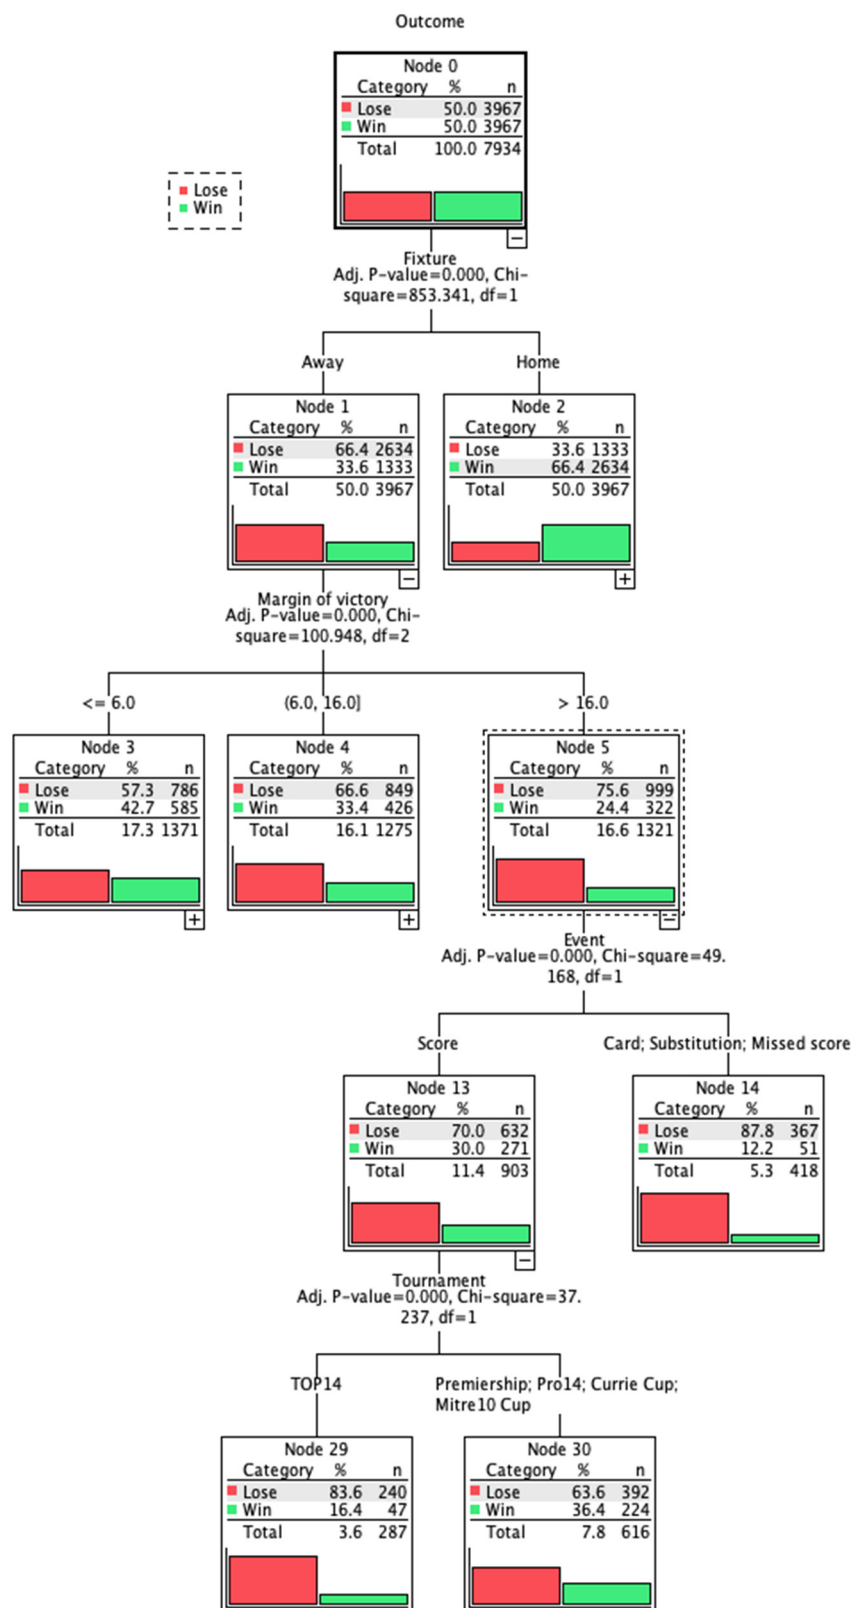

Figure S4. Away Unbalanced Games.

Table S1. EXHAUSTIVE CHAID Decision Tree Table.

| Node | Lose |         | Win  |         | Total |         | Predicted Category | Parent Node | Variable          | Primary Independent Variable |            |    |                                             |
|------|------|---------|------|---------|-------|---------|--------------------|-------------|-------------------|------------------------------|------------|----|---------------------------------------------|
|      | N    | Percent | N    | Percent | N     | Percent |                    |             |                   | Sig. <sup>a</sup>            | Chi-Square | df | Split Values                                |
| 0    | 3967 | 50.0%   | 3967 | 50.0%   | 7934  | 100.0%  | Lose               |             |                   |                              |            |    |                                             |
| 1    | 2634 | 66.4%   | 1333 | 33.6%   | 3967  | 50.0%   | Lose               | 0           | Fixture           | 0.000                        | 853.341    | 1  | Away                                        |
| 2    | 1333 | 33.6%   | 2634 | 66.4%   | 3967  | 50.0%   | Win                | 0           | Fixture           | 0.000                        | 853.341    | 1  | Home                                        |
| 3    | 786  | 57.3%   | 585  | 42.7%   | 1371  | 17.3%   | Lose               | 1           | Margin of victory | 0.000                        | 100.948    | 2  | ≤ 6.0                                       |
| 4    | 849  | 66.6%   | 426  | 33.4%   | 1275  | 16.1%   | Lose               | 1           | Margin of victory | 0.000                        | 100.948    | 2  | (6.0, 16.0]                                 |
| 5    | 999  | 75.6%   | 322  | 24.4%   | 1321  | 16.6%   | Lose               | 1           | Margin of victory | 0.000                        | 100.948    | 2  | > 16.0                                      |
| 6    | 585  | 42.7%   | 785  | 57.3%   | 1370  | 17.3%   | Win                | 2           | Margin of victory | 0.000                        | 101.734    | 2  | ≤ 6.0                                       |
| 7    | 426  | 33.4%   | 848  | 66.6%   | 1274  | 16.1%   | Win                | 2           | Margin of victory | 0.000                        | 101.734    | 2  | (6.0, 16.0]                                 |
| 8    | 322  | 24.3%   | 1001 | 75.7%   | 1323  | 16.7%   | Win                | 2           | Margin of victory | 0.000                        | 101.734    | 2  | > 16.0                                      |
| 9    | 686  | 58.7%   | 482  | 41.3%   | 1168  | 14.7%   | Lose               | 3           | Season            | 0.012                        | 6.343      | 1  | PRE-COVID                                   |
| 10   | 100  | 49.3%   | 103  | 50.7%   | 203   | 2.6%    | Win                | 3           | Season            | 0.012                        | 6.343      | 1  | COVID 20-21                                 |
| 11   | 574  | 62.5%   | 344  | 37.5%   | 918   | 11.6%   | Lose               | 4           | Event             | 0.000                        | 24.303     | 1  | Score                                       |
| 12   | 275  | 77.0%   | 82   | 23.0%   | 357   | 4.5%    | Lose               | 4           | Event             | 0.000                        | 24.303     | 1  | Card; Substitution; Missed score            |
| 13   | 632  | 70.0%   | 271  | 30.0%   | 903   | 11.4%   | Lose               | 5           | Event             | 0.000                        | 49.168     | 1  | Score                                       |
| 14   | 367  | 87.8%   | 51   | 12.2%   | 418   | 5.3%    | Lose               | 5           | Event             | 0.000                        | 49.168     | 1  | Card; Substitution; Missed score            |
| 15   | 482  | 41.3%   | 685  | 58.7%   | 1167  | 14.7%   | Win                | 6           | Season            | 0.012                        | 6.293      | 1  | PRE-COVID                                   |
| 16   | 103  | 50.7%   | 100  | 49.3%   | 203   | 2.6%    | Lose               | 6           | Season            | 0.012                        | 6.293      | 1  | COVID 20-21                                 |
| 17   | 95   | 25.9%   | 272  | 74.1%   | 367   | 4.6%    | Win                | 7           | Tournament        | 0.000                        | 22.981     | 2  | TOP14                                       |
| 18   | 248  | 34.1%   | 480  | 65.9%   | 728   | 9.2%    | Win                | 7           | Tournament        | 0.000                        | 22.981     | 2  | Premiership; Pro14; Currie Cup              |
| 19   | 83   | 46.4%   | 96   | 53.6%   | 179   | 2.3%    | Win                | 7           | Tournament        | 0.000                        | 22.981     | 2  | Mitre10 Cup                                 |
| 20   | 219  | 20.2%   | 863  | 79.8%   | 1082  | 13.6%   | Win                | 8           | Event             | 0.000                        | 73.355     | 2  | Score                                       |
| 21   | 68   | 54.4%   | 57   | 45.6%   | 125   | 1.6%    | Lose               | 8           | Event             | 0.000                        | 73.355     | 2  | Card; Substitution                          |
| 22   | 35   | 30.2%   | 81   | 69.8%   | 116   | 1.5%    | Win                | 8           | Event             | 0.000                        | 73.355     | 2  | Missed score                                |
| 23   | 256  | 64.5%   | 141  | 35.5%   | 397   | 5.0%    | Lose               | 9           | Tournament        | 0.031                        | 12.927     | 2  | TOP14                                       |
| 24   | 403  | 56.9%   | 305  | 43.1%   | 708   | 8.9%    | Lose               | 9           | Tournament        | 0.031                        | 12.927     | 2  | Premiership; Pro14; Mitre10 Cup             |
| 25   | 27   | 42.9%   | 36   | 57.1%   | 63    | 0.8%    | Win                | 9           | Tournament        | 0.031                        | 12.927     | 2  | Currie Cup                                  |
| 26   | 203  | 72.5%   | 77   | 27.5%   | 280   | 3.5%    | Lose               | 11          | Tournament        | 0.000                        | 21.796     | 2  | TOP14                                       |
| 27   | 300  | 60.4%   | 197  | 39.6%   | 497   | 6.3%    | Lose               | 11          | Tournament        | 0.000                        | 21.796     | 2  | Premiership; Pro14; Currie Cup              |
| 28   | 71   | 50.4%   | 70   | 49.6%   | 141   | 1.8%    | Lose               | 11          | Tournament        | 0.000                        | 21.796     | 2  | Mitre10 Cup                                 |
| 29   | 240  | 83.6%   | 47   | 16.4%   | 287   | 3.6%    | Lose               | 13          | Tournament        | 0.000                        | 37.237     | 1  | TOP14                                       |
| 30   | 392  | 63.6%   | 224  | 36.4%   | 616   | 7.8%    | Lose               | 13          | Tournament        | 0.000                        | 37.237     | 1  | Premiership; Pro14; Currie Cup; Mitre10 Cup |
| 31   | 141  | 35.6%   | 255  | 64.4%   | 396   | 5.0%    | Win                | 15          | Tournament        | 0.034                        | 12.743     | 2  | TOP14                                       |
| 32   | 305  | 43.1%   | 403  | 56.9%   | 708   | 8.9%    | Win                | 15          | Tournament        | 0.034                        | 12.743     | 2  | Premiership; Pro14; Mitre10 Cup             |
| 33   | 36   | 57.1%   | 27   | 42.9%   | 63    | 0.8%    | Lose               | 15          | Tournament        | 0.034                        | 12.743     | 2  | Currie Cup                                  |
| 34   | 200  | 31.8%   | 428  | 68.2%   | 628   | 7.9%    | Win                | 18          | Season            | 0.002                        | 10.021     | 1  | PRE-COVID                                   |
| 35   | 48   | 48.0%   | 52   | 52.0%   | 100   | 1.3%    | Win                | 18          | Season            | 0.002                        | 10.021     | 1  | COVID 20-21                                 |
| 36   | 39   | 10.8%   | 321  | 89.2%   | 360   | 4.5%    | Win                | 20          | Tournament        | 0.000                        | 35.001     | 2  | TOP14                                       |
| 37   | 100  | 22.2%   | 350  | 77.8%   | 450   | 5.7%    | Win                | 20          | Tournament        | 0.000                        | 35.001     | 2  | Premiership; Pro14                          |
| 38   | 80   | 29.4%   | 192  | 70.6%   | 272   | 3.4%    | Win                | 20          | Tournament        | 0.000                        | 35.001     | 2  | Currie Cup; Mitre10 Cup                     |

|    |     |       |     |       |     |      |      |    |            |       |        |   |                                      |
|----|-----|-------|-----|-------|-----|------|------|----|------------|-------|--------|---|--------------------------------------|
| 39 | 26  | 40.6% | 38  | 59.4% | 64  | 0.8% | Win  | 21 | Tournament | 0.031 | 10.032 | 1 | TOP14; Pro14                         |
| 40 | 42  | 68.9% | 19  | 31.1% | 61  | 0.8% | Lose | 21 | Tournament | 0.031 | 10.032 | 1 | Premiership; Currie Cup; Mitre10 Cup |
| 41 | 270 | 62.6% | 161 | 37.4% | 431 | 5.4% | Lose | 27 | Season     | 0.008 | 7.069  | 1 | PRE-COVID                            |
| 42 | 30  | 45.5% | 36  | 54.5% | 66  | 0.8% | Win  | 27 | Season     | 0.008 | 7.069  | 1 | COVID 20-21                          |
| 43 | 96  | 31.7% | 207 | 68.3% | 303 | 3.8% | Win  | 31 | Event      | 0.033 | 8.660  | 1 | Score                                |
| 44 | 45  | 48.4% | 48  | 51.6% | 93  | 1.2% | Win  | 31 | Event      | 0.033 | 8.660  | 1 | Card; Substitution; Missed score     |
| 45 | 28  | 9.2%  | 277 | 90.8% | 305 | 3.8% | Win  | 36 | Season     | 0.017 | 5.647  | 1 | PRE-COVID                            |
| 46 | 11  | 20.0% | 44  | 80.0% | 55  | 0.7% | Win  | 36 | Season     | 0.017 | 5.647  | 1 | COVID 20-21                          |

Growing Method: EXHAUSTIVE CHAID

Dependent Variable: Outcome

a. Bonferroni adjusted
